# Supplementary material for: Gradients of glucose metabolism regulate morphogen signalling required for specifying tonotopic organisation in the chicken cochlea
Source: eLife. 2023 Aug 4;12:e86233. doi: 10.7554/eLife.86233 (PMC10425173; doi:10.7554/eLife.86233)
Supplement: Figure 3—figure supplement 3—source data 1. [file elife-86233-fig3-figsupp3-data1.xlsx]

## Sheet: Sheet1
	bulk RNA-seq data
	E6.5
	Gene	Proximal	Distal
	Bmp7	49.3	147.15	*
	Got2	481.83	29.36	*
	Sdhd	517.18	272.14	*
	Aco2	313.23	273.38	*
	Ldhb	1277.25	993.42
	Pkm2	2591.58	1979.26
	Ldha	70.16	333.28	*
	Affymetrix microarray data
	E14
	Gene	Fold change proximal vs distal
	Got2	1.6	*
	Nnt	1.5	*
	Idh3b	1.4
	Idh3a	-1.6	*
