# Supplementary material for: Gradients of glucose metabolism regulate morphogen signalling required for specifying tonotopic organisation in the chicken cochlea
Source: eLife. 2023 Aug 4;12:e86233. doi: 10.7554/eLife.86233 (PMC10425173; doi:10.7554/eLife.86233)
Supplement: Source data 2. — p-Values in the left-hand column indicate whether the proximal–distal differences in HC luminal SA was altered in inhibitor-treated explants compared to controls. The p-values in the interaction column indicate whether the proximal–distal differences in luminal SA changed after treatment. YZ9 and Chdl1 + 2-deoxy-D-glucose (2-DOG) were the only treatments which did not produce a significant interaction, indicating preservation of the tonotopic gradient. [file elife-86233-data2.xlsx]

## Sheet: Sheet1
Lumenal surface area
	2-way RM ANOVA p-values
treatment	proximal-distal differences		interaction	significant interaction?
6-AN	0.0005		0.0002	***
2-DOG	0.0002		0.0001	***
SAM	0.0011		0.0003	***
YZ9	0.0055		0.1962	ns
UK5099	0.0287		0.0112	*
Bmp7	0.0001		0.0001	***
Chdl1	0.0001		0.0257	*
Chdl1+2-DOG	0.0015		0.3702	ns
Shikonin	0.0021		0.0431	*
Shikonin + 6-AN	0.0007		0.0056	**
